# Supplementary material for: Functional brain growth trajectories across the first decade of life from a single longitudinal cohort
Source: Research Square preprint supplement (doi:10.21203/rs.3.rs-9557891/v1), 2026-05-14
Supplement: Supplementary file 1 [file 5efb9c4abee0f06c8dd91444.pdf]

## Supplemental Material

### **Functional brain growth trajectories across the first decade of life from a single longitudinal cohort**

Haitao Chen<sup>\*1,2,3</sup>, Janelle Liu<sup>\*1,2,4</sup>, Yifan Gao<sup>1,2,5</sup>, Kaiqiao Han<sup>6</sup>, Joe Blocher<sup>7</sup>, Emil Cornea<sup>7</sup>,  
Yizhou Sun<sup>6</sup>, Debiao Li<sup>1,2,3</sup>, John H. Gilmore<sup>7</sup>, Wei Gao<sup>1,2</sup>

<sup>1</sup>Cedars-Sinai Health Sciences University Biomedical Imaging Research Institute, Cedars-Sinai Medical Center, Los Angeles, CA. <sup>2</sup>Department of Biomedical Sciences, Cedars-Sinai Medical Center, Los Angeles, CA. <sup>3</sup>Department of Bioengineering, University of California, Los Angeles, Los Angeles, CA. <sup>4</sup>Department of Computational Biomedicine, Cedars-Sinai Medical Center, Los Angeles, CA. <sup>5</sup>Tsinghua Medicine, Tsinghua University, Beijing, China. <sup>6</sup>Department of Computer Science, University of California, Los Angeles, Los Angeles, CA. <sup>7</sup>Department of Psychiatry, University of North Carolina Chapel Hill, Chapel Hill, NC.

\*Co-first author

### a) Network-level NDD effects on Gradient2

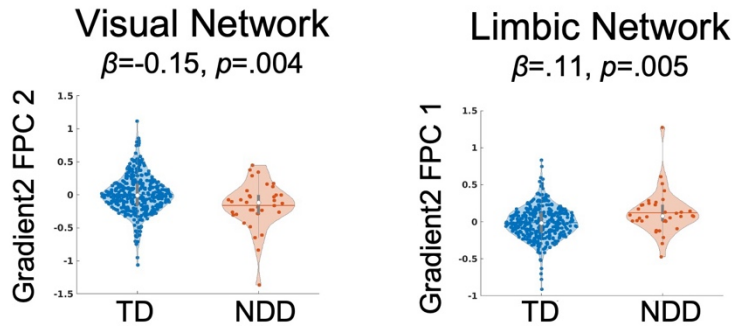

### b) ROI-level NDD effects on Gradient2

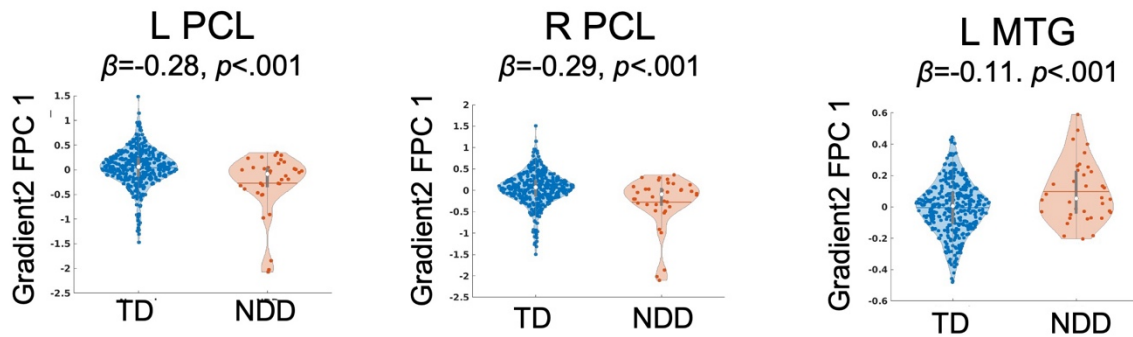

**Figure S1. Altered functional gradient development in children with neurodevelopmental disorders: network- and ROI-level effects.** Group differences were observed in the longitudinal growth trajectories of the primary-to-transmodal gradient (Gradient2) between typically developing controls (TD) and children later diagnosed with neurodevelopmental disorders (NDD). Functional principal component (FPC) scores derived from multivariate sparse functional principal components analysis (mSPFCA) were used to quantify trajectory deviations across networks and regions of interest (ROI). At the network level, significant effects after false discovery rate (FDR) correction were observed in the visual and limbic networks (**a**). At the ROI level, significant effects after FDR correction were observed in the left paracentral lobule (PCL), right PCL, and left middle temporal gyrus (MTG) (**b**).

a) FC+BAG Model Shapley Values

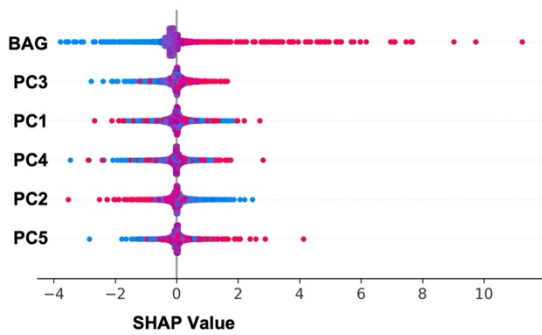

b) FC+Random Model Shapley Values

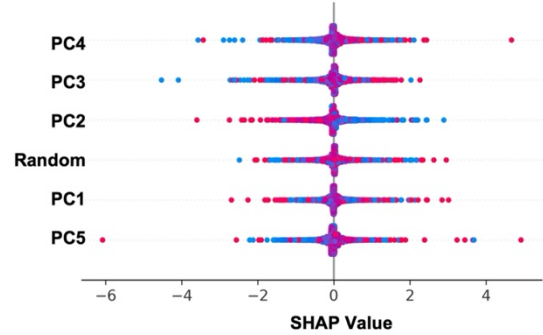

**Figure S2. Feature importance plots.** In the FC+BAG classification model, brain age gap (BAG) was the most influential feature (a). In the FC+Random classification model, the random feature (a random Gaussian feature matched to the mean and standard deviation of BAG to control for model improvement associated with adding an extra feature dimension) ranked substantially lower (b), confirming that BAG contributes meaningful classification information rather than reflecting a dimensionality artifact.

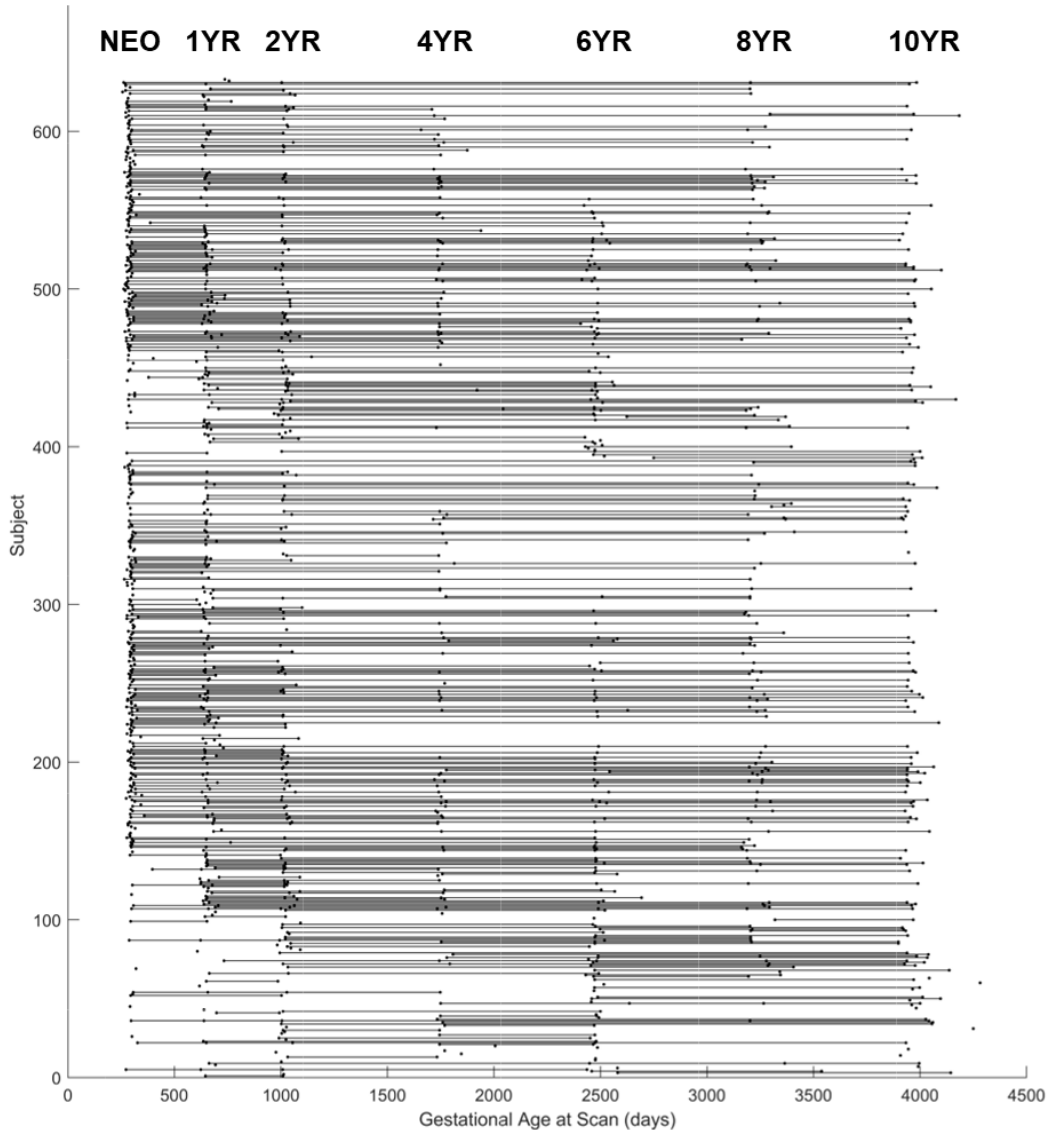

**Figure S3. Distribution of good quality rsfMRI scans across all timepoints.** The distribution of gestational age at scan for all included infant subjects (n=633 totaling 1476 datasets across neonates [NEO], 1-year-olds [1YR], 2-year-olds [2YR], 4-year-olds [4YR], 6-year-olds [6YR], 8-year-olds [8YR], and 10-year-olds [10YR]) whose image quality passed the quality control procedures is shown. Each dot represents a successful resting-state functional magnetic resonance imaging scan, and dots along each line represent all the available longitudinal scans for a given subject.

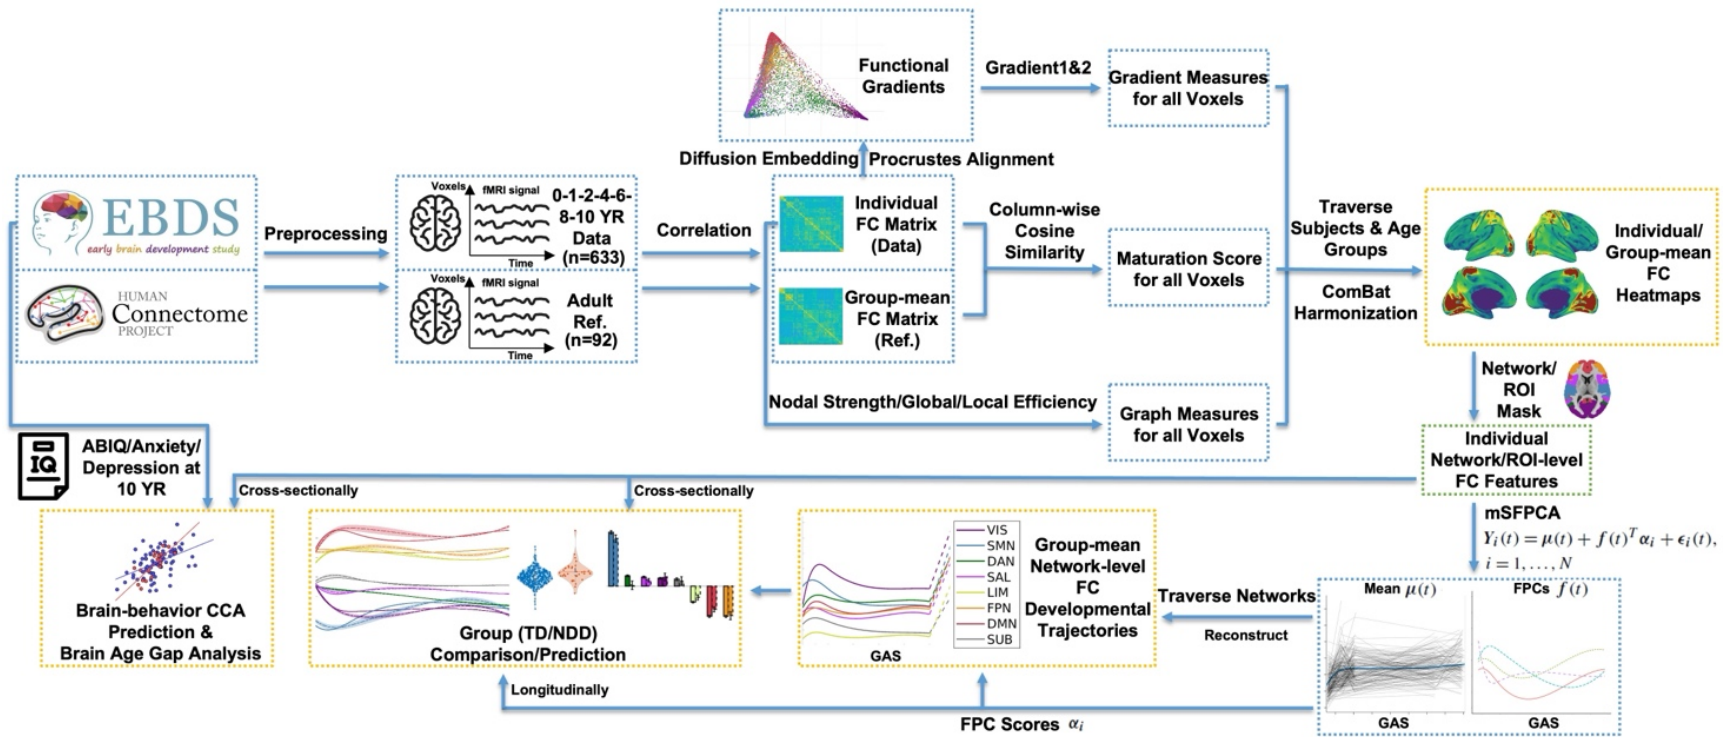

**Figure S4. Methods schematic.** After preprocessing, a voxelwise functional connectivity matrix was generated for each rsfMRI scan. Functional connectivity maturation score, graph theory measures (nodal strength, nodal global efficiency, nodal local efficiency), and functional gradient scores were derived for each voxel from the voxelwise FC matrix. Scanner, mean framewise displacement (FD), and scan length were regressed out for each voxel to form heatmaps for each functional connectivity measure. Group-mean heatmaps were then derived from individual heatmaps. Network-level functional connectivity features were obtained from individual heatmaps, after which multivariate sparse functional principal components analysis (mSFPCA) was used to generate functional principal components

(FPCs) and derived FPC scores. Individual trajectories were then reconstructed, and group-level trajectories were obtained. Group comparison between typically developing controls and neurodevelopmental risk subgroups (neurodevelopmental diagnosis [NDD] and maternal psychiatric diagnosis [MPD]) were conducted both longitudinally and cross-sectionally. Brain-behavioral CCA predictions and Brain Age Gap analysis were also conducted.

**Table S1. Subject demographics.**

|                                 | All<br>n=633     | TD<br>n=379      | NDD<br>n=36      | MPD<br>n=100     | Autism<br>n=14   | ADHD<br>n=27     |
|---------------------------------|------------------|------------------|------------------|------------------|------------------|------------------|
| Sex (Male/Female)               | 341 / 292        | 190 / 189        | 29 / 7           | 60 / 40          | 13 / 1           | 21 / 6           |
| Birthweight (g)                 | 2958.51 (695.17) | 3095.31 (556.27) | 3049.89 (796.59) | 3082.76 (638.12) | 2920.00 (724.86) | 3091.85 (783.82) |
| Gestational age at birth (days) | 264.04 (18.60)   | 269.31 (12.52)   | 261.78 (19.91)   | 268.04 (15.89)   | 257.71 (19.55)   | 263.81 (19.29)   |
| Maternal education, years       | 14.85 (3.48)     | 15.65 (3.23)     | 13.81 (2.63)     | 11.92 (3.06)     | 14.14 (2.98)     | 13.89 (2.64)     |
| Mother's Race & Ethnicity       |                  |                  |                  |                  |                  |                  |
| White                           | 480 (75.83%)     | 301 (79.42%)     | 27 (75.00%)      | 59 (59.00%)      | 12 (85.71%)      | 20 (74.07%)      |
| Black                           | 143 (22.59%)     | 69 (18.21%)      | 9 (25.00%)       | 41 (41.00%)      | 2 (14.29%)       | 7 (25.93%)       |
| Asian                           | 8 (1.26%)        | 7 (1.85%)        | 0 (0.00%)        | 0 (0.00%)        | 0 (0.00%)        | 0 (0.00%)        |
| Indigenous/AI-AN                | 2 (0.32%)        | 2 (0.53%)        | 0 (0.00%)        | 0 (0.00%)        | 0 (0.00%)        | 0 (0.00%)        |
| Hispanic                        | 72 (11.37%)      | 44 (11.61%)      | 2 (5.56%)        | 10 (10.00%)      | 2 (14.29%)       | 0 (0.00%)        |
| Father's Race & Ethnicity       |                  |                  |                  |                  |                  |                  |
| White                           | 442 (69.83%)     | 281 (74.14%)     | 19 (52.78%)      | 46 (46.00%)      | 9 (64.29%)       | 14 (51.85%)      |
| Black                           | 161 (25.43%)     | 77 (20.32%)      | 13 (36.11%)      | 49 (49.00%)      | 4 (28.57%)       | 10 (37.04%)      |
| Asian                           | 14 (2.21%)       | 12 (3.17%)       | 0 (0.00%)        | 1 (1.00%)        | 0 (0.00%)        | 0 (0.00%)        |
| Indigenous/AI-AN                | 6 (0.95%)        | 2 (0.53%)        | 1 (2.78%)        | 2 (2.00%)        | 0 (0.00%)        | 1 (3.70%)        |
| Hispanic                        | 82 (12.95%)      | 44 (11.61%)      | 5 (13.89%)       | 15 (15.00%)      | 1 (7.14%)        | 4 (14.81%)       |
| rsfMRI Timepoints               |                  |                  |                  |                  |                  |                  |
| Neonate                         | 372              | 226              | 14               | 57               | 8                | 7                |
| Gestational age at scan (days)  | 295.27 (16.90)   | 295.19 (14.68)   | 295.43 (10.30)   | 301.74 (17.00)   | 293.25 (8.35)    | 298.00 (11.60)   |
| Scanner (Allegra/Trio)          | 295/77           | 172/54           | 10/4             | 51/6             | 5/3              | 6/1              |
| 1-Year-Olds                     | 273              | 149              | 14               | 47               | 6                | 10               |
| Gestational age at scan (days)  | 657.82 (25.59)   | 660.23 (25.69)   | 655.93 (19.57)   | 655.96 (29.80)   | 653.83 (25.97)   | 660.70 (18.48)   |
| Scanner (Allegra/Trio)          | 212/61           | 112/37           | 12/2             | 37/10            | 5/1              | 9/1              |
| 2-Year-Olds                     | 220              | 111              | 19               | 37               | 9                | 14               |
| Gestational age at scan (days)  | 1022.19 (24.06)  | 1021.29 (22.91)  | 1018.74 (16.24)  | 1021.62 (26.83)  | 1023.56 (12.32)  | 1018.21 (16.95)  |
| Scanner (Allegra/Trio)          | 163/57           | 78/33            | 18/1             | 30/7             | 8/1              | 14/0             |
| 4-Year-Olds                     | 125              | 80               | 4                | 16               | 1                | 3                |
| Gestational age at scan (days)  | 1758.76 (47.04)  | 1759.80 (48.66)  | 1749.00 (13.54)  | 1772.56 (63.30)  | 1739.00 (—)      | 1752.33 (14.43)  |
| Scanner (Allegra/Trio)          | 28/97            | 17/63            | 1/3              | 6/10             | 0/1              | 1/2              |
| 6-Year-Olds                     | 175              | 99               | 16               | 20               | 4                | 14               |
| Gestational age at scan (days)  | 2487.54 (43.53)  | 2482.10 (42.54)  | 2496.44 (38.32)  | 2493.70 (40.56)  | 2507.75 (55.03)  | 2500.79 (39.01)  |
| Scanner (Allegra/Trio)          | 33/142           | 17/82            | 4/12             | 2/18             | 1/3              | 4/10             |
| 8-Year-Olds                     | 155              | 96               | 13               | 22               | 4                | 11               |
| Gestational age at scan (days)  | 3247.08 (60.35)  | 3252.88 (61.22)  | 3230.92 (38.69)  | 3214.45 (28.50)  | 3234.75 (47.68)  | 3233.91 (41.41)  |

|                                                   |                             |                             |                             |                             |                             |                             |
|---------------------------------------------------|-----------------------------|-----------------------------|-----------------------------|-----------------------------|-----------------------------|-----------------------------|
| Scanner (Trio/Trio-NewProtocol/Prisma)            | 22/24/109                   | 16/16/64                    | 2/2/09                      | 3/4/15                      | 1/1/2                       | 1/2/8                       |
| 10-Year-Olds                                      | 156                         | 103                         | 13                          | 11                          | 3                           | 12                          |
| Gestational age at scan (days)                    | 3977.39 (60.89)             | 3976.73 (56.90)             | 3982.08 (77.10)             | 3986.27 (110.40)            | 4042.33 (90.88)             | 3983.17 (80.42)             |
| Scanner (Trio/Trio-NewProtocol/Prisma)            | 6/30/120                    | 5/21/77                     | 1/4/8                       | 0/4/7                       | 1/0/2                       | 1/4/7                       |
| Behavioral Outcomes (8 years)                     |                             |                             |                             |                             |                             |                             |
| GA at behavioral assessment (days)                | 3252.16 (63.17)             | 3254.86 (60.60)             | 3258.71 (52.75)             | 3225.73 (43.32)             | 3258.25 (56.58)             | 3256.85 (51.22)             |
| SB-5 ABIQ standard score                          | 103.42 (12.71) <sup>a</sup> | 104.36 (12.76) <sup>a</sup> | 103.38 (12.24) <sup>a</sup> | 98.32 (12.42) <sup>a</sup>  | 106.38 (10.93) <sup>a</sup> | 104.35 (12.89) <sup>a</sup> |
| SB-5 WM standard score                            | 105.00 (11.63) <sup>b</sup> | 107.61 (11.03) <sup>b</sup> | 101.71 (11.88) <sup>b</sup> | 97.29 (11.60) <sup>b</sup>  | 101.62 (15.10) <sup>b</sup> | 102.15 (11.89) <sup>b</sup> |
| BRIEF WM T-score                                  | 52.50 (10.22) <sup>c</sup>  | 50.07 (8.46) <sup>c</sup>   | 63.91 (9.58) <sup>c</sup>   | 57.46 (10.59) <sup>c</sup>  | 58.62 (11.64) <sup>c</sup>  | 65.05 (8.97) <sup>c</sup>   |
| BASC-2 Anxiety T-score                            | 49.91 (10.39) <sup>d</sup>  | 47.39 (9.09) <sup>d</sup>   | 53.64 (13.20) <sup>d</sup>  | 54.24 (11.22) <sup>d</sup>  | 51.00 (8.83) <sup>d</sup>   | 53.50 (14.06) <sup>d</sup>  |
| BASC-2 Depression T-score                         | 50.42 (11.38) <sup>e</sup>  | 47.44 (8.56) <sup>e</sup>   | 58.91 (16.40) <sup>e</sup>  | 60.44 (16.03) <sup>e</sup>  | 57.25 (15.83) <sup>e</sup>  | 57.63 (16.11) <sup>e</sup>  |
| Behavioral Outcomes (10 years)                    |                             |                             |                             |                             |                             |                             |
| GA at behavioral assessment (days)                | 3978.18 (62.75)             | 3978.64 (62.96)             | 3975.82 (69.43)             | 3973.30 (78.35)             | 3990.00 (73.55)             | 3978.00 (74.17)             |
| SB-5 ABIQ standard score                          | 103.46 (11.05) <sup>f</sup> | 104.53 (10.40) <sup>f</sup> | 102.86 (9.28) <sup>f</sup>  | 101.92 (11.78) <sup>f</sup> | 100.75 (7.65) <sup>f</sup>  | 104.00 (9.76) <sup>f</sup>  |
| SB-5 WM standard score                            | 106.69 (10.62) <sup>g</sup> | 108.32 (10.68) <sup>g</sup> | 103.68 (11.89) <sup>g</sup> | 101.19 (8.35) <sup>g</sup>  | 106.00 (9.41) <sup>g</sup>  | 103.50 (11.90) <sup>g</sup> |
| BRIEF WM T-score                                  | 52.21 (10.37) <sup>h</sup>  | 50.56 (9.63) <sup>h</sup>   | 62.95 (7.93) <sup>h</sup>   | 58.23 (10.71) <sup>h</sup>  | 60.43 (7.50) <sup>h</sup>   | 62.94 (8.44) <sup>h</sup>   |
| BASC-2 Anxiety T-score                            | 50.71 (9.26) <sup>i</sup>   | 49.87 (8.93) <sup>i</sup>   | 52.65 (8.41) <sup>i</sup>   | 53.12 (10.62) <sup>i</sup>  | 53.29 (9.27) <sup>i</sup>   | 51.62 (7.93) <sup>i</sup>   |
| BASC-2 Depression T-score                         | 50.61 (10.59) <sup>j</sup>  | 49.04 (10.12) <sup>j</sup>  | 57.85 (14.19) <sup>j</sup>  | 57.24 (13.15) <sup>j</sup>  | 62.14 (16.10) <sup>j</sup>  | 56.06 (12.50) <sup>j</sup>  |
| <sup>a</sup> n with SB-5 ABIQ data (8yr)          | 248                         | 146                         | 24                          | 41                          | 8                           | 20                          |
| <sup>b</sup> n with SB-5 WM data (8yr)            | 246                         | 144                         | 24                          | 41                          | 8                           | 20                          |
| <sup>c</sup> n with BRIEF WM data (8yr)           | 240                         | 141                         | 23                          | 39                          | 8                           | 19                          |
| <sup>d</sup> n with BASC-2 Anxiety data (8yr)     | 246                         | 145                         | 22                          | 41                          | 7                           | 18                          |
| <sup>e</sup> n with BASC-2 Depression data (8yr)  | 247                         | 145                         | 23                          | 41                          | 8                           | 19                          |
| <sup>f</sup> n with SB-5 ABIQ data (10yr)         | 214                         | 133                         | 22                          | 25                          | 8                           | 18                          |
| <sup>g</sup> n with SB-5 WM data (10yr)           | 228                         | 143                         | 22                          | 27                          | 8                           | 18                          |
| <sup>h</sup> n with BRIEF WM data (10yr)          | 233                         | 150                         | 20                          | 26                          | 7                           | 16                          |
| <sup>i</sup> n with BASC-2 Anxiety data (10yr)    | 215                         | 135                         | 20                          | 25                          | 7                           | 16                          |
| <sup>j</sup> n with BASC-2 Depression data (10yr) | 215                         | 135                         | 20                          | 25                          | 7                           | 16                          |
